# Supplementary material for: Determination of free amino acids in plants by liquid chromatography coupled to tandem mass spectrometry (LC-MS/MS)
Source: Royal Society of Chemistry journal article supplement (doi:10.1039/c5ay01280e), 2015-01-01

Calibration Curve 1

m/z : 303,20>70,10  
Name : Arginine  
Quantitative Method : External Standard  
Function :  $f(x)=1,06392e+006*x+0$   
R2=0,9989736

FitType : Linear

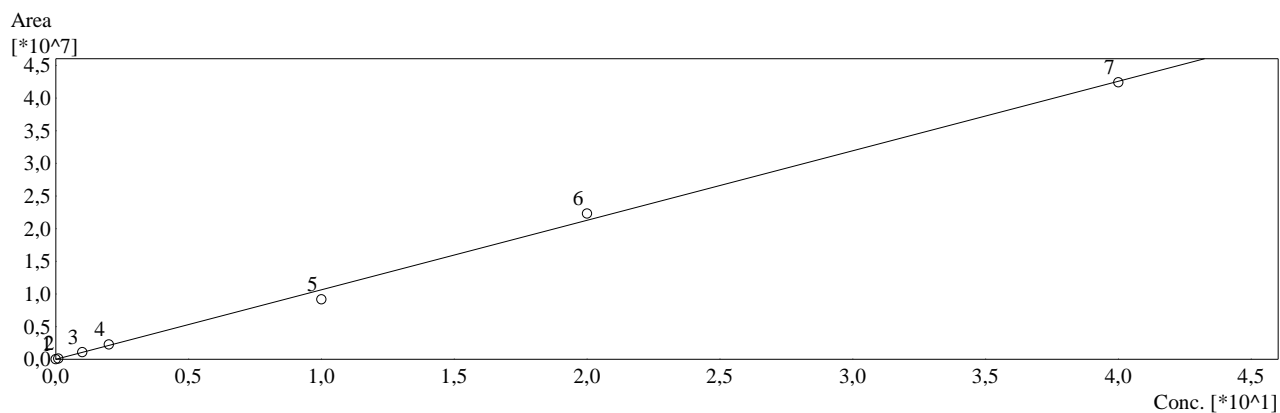

Calibration Curve 2

m/z : 275,20>172,00  
Name : Glutamine  
Quantitative Method : External Standard  
Function :  $f(x)=3,16599e+006*x+0$   
R2=0,9974048

FitType : Linear

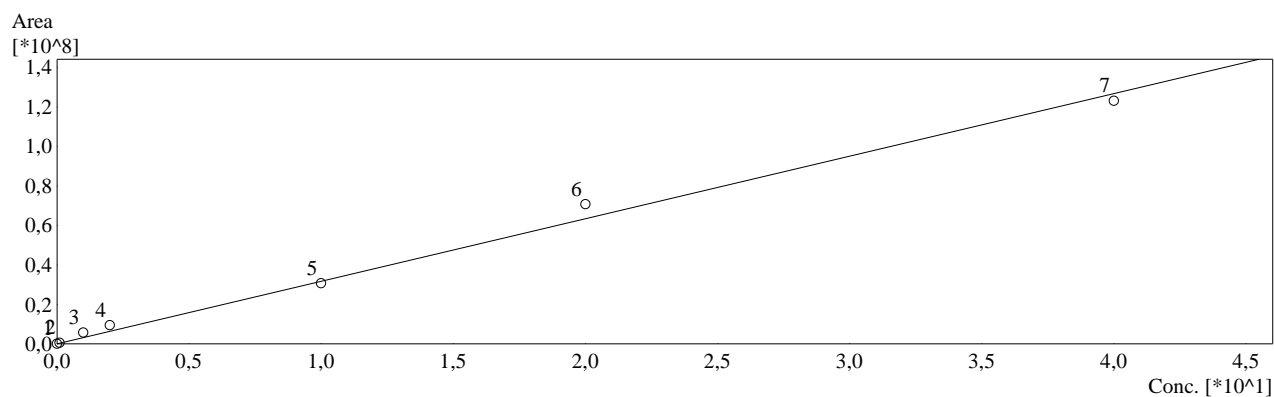

Calibration Curve 3

m/z : 234,20>146,00  
Name : Serine  
Quantitative Method : External Standard  
Function :  $f(x)=1,00163e+006*x+0$   
R2=0,9957785

FitType : Linear

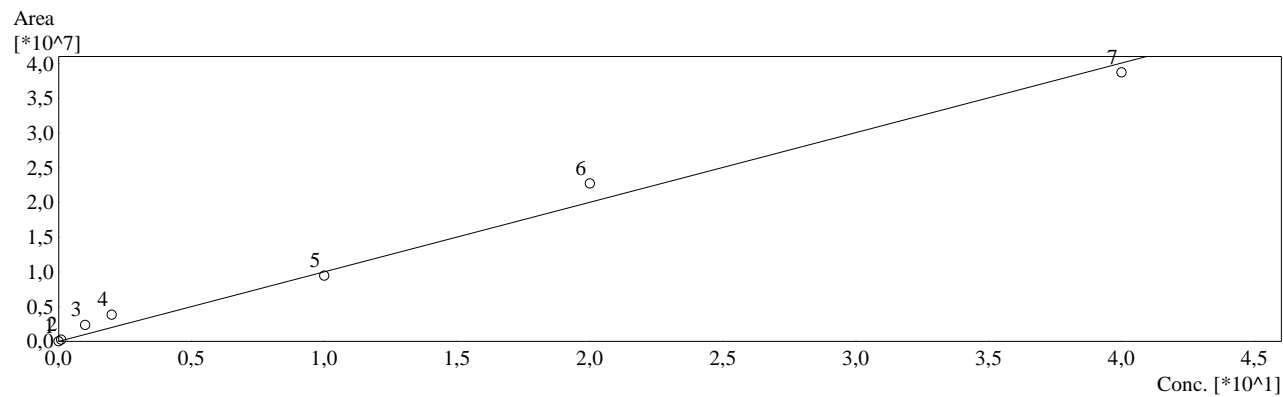

Calibration Curve 4

m/z : 243,20>157,20  
Name : Asparagine  
Quantitative Method : External Standard  
Function :  $f(x)=254375*x+0$   
R2=0,9950814

FitType : Linear

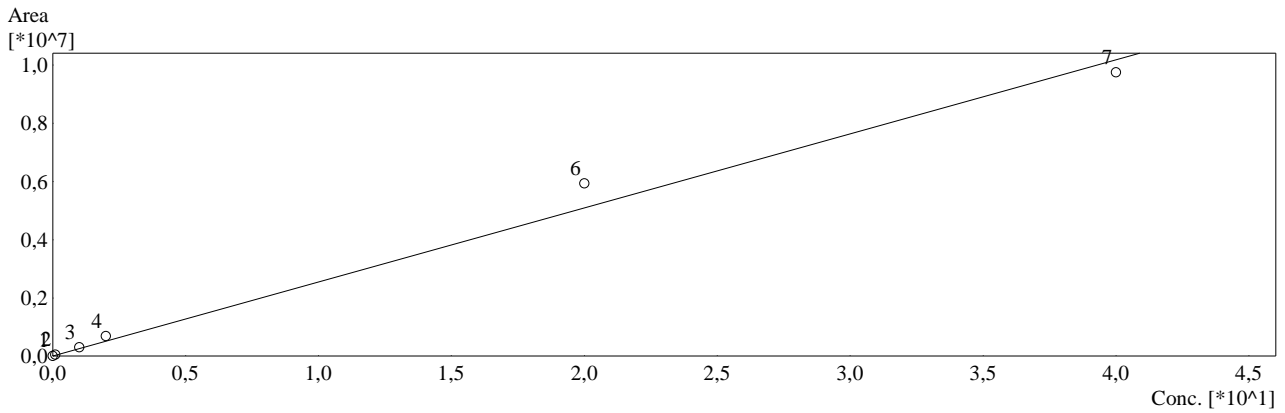

Calibration Curve 5

m/z : 204,20>76,00  
Name : Glycine  
Quantitative Method : External Standard  
Function :  $f(x)=584578*x+0$   
R2=0,9812366

FitType : Linear

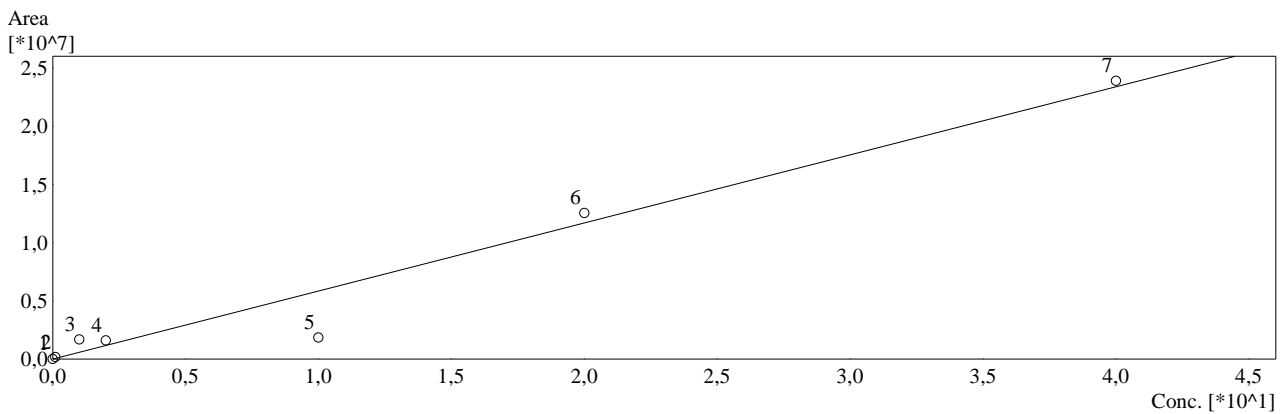

Calibration Curve 6

m/z : 248,20>74,05  
Name : Threonine  
Quantitative Method : External Standard  
Function :  $f(x)=2.72730e+006*x+0$   
R2=0,9890986

FitType : Linear

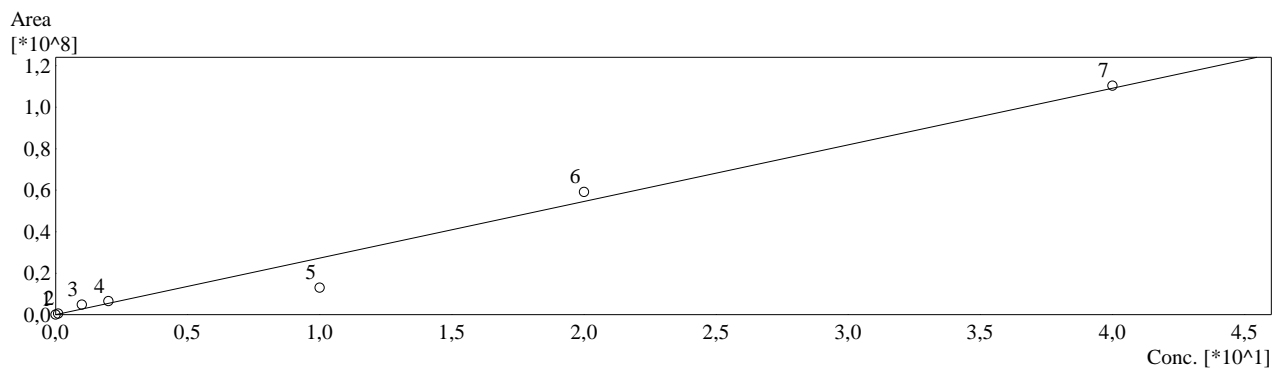

Calibration Curve 7

m/z : 218,20>130,20  
Name : Alanine  
Quantitative Method : External Standard  
Function :  $f(x)=2,08340e+006*x+0$   
R2=0,9981055

FitType : Linear

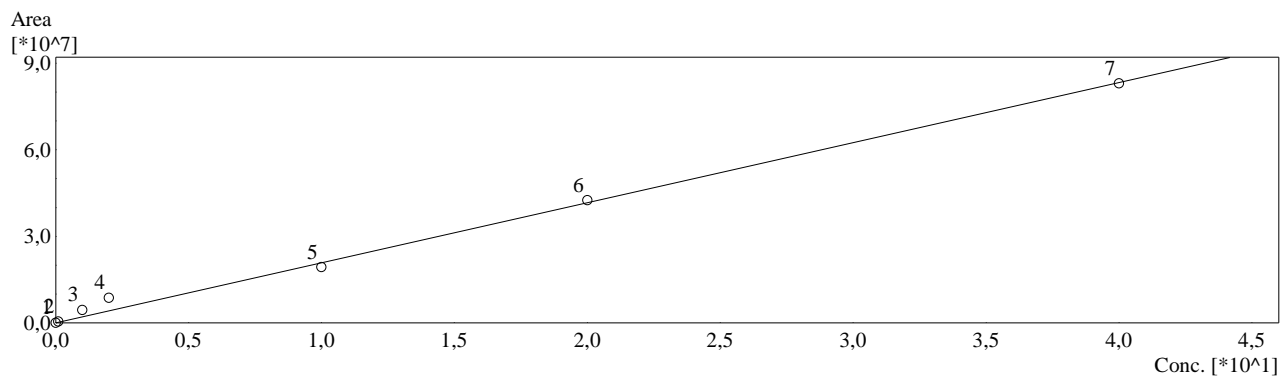

Calibration Curve 8

m/z : 278,20>190,15  
Name : Methionine  
Quantitative Method : External Standard  
Function :  $f(x)=5,33783e+006*x+0$   
R2=0,9909508

FitType : Linear

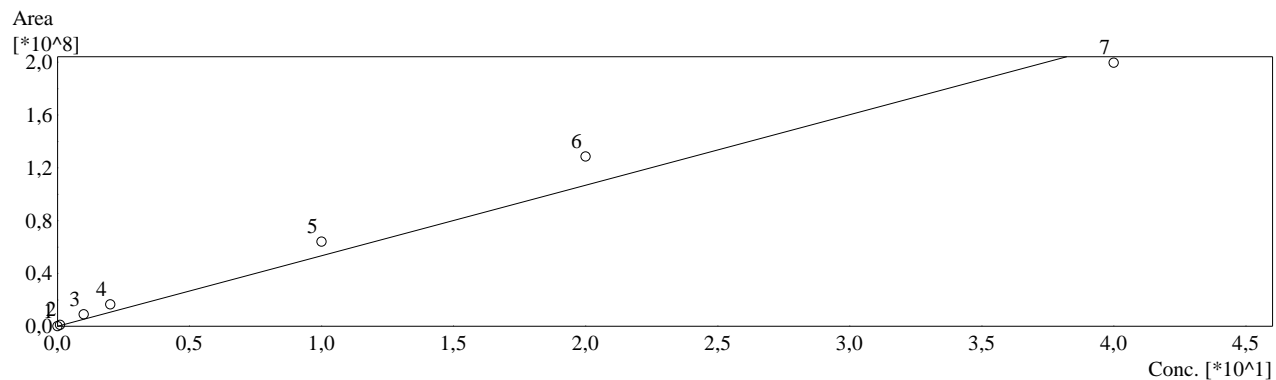

Calibration Curve 9

m/z : 244,20>156,05  
Name : Proline  
Quantitative Method : External Standard  
Function :  $f(x)=6,79216e+006*x+0$   
R2=0,9811597

FitType : Linear

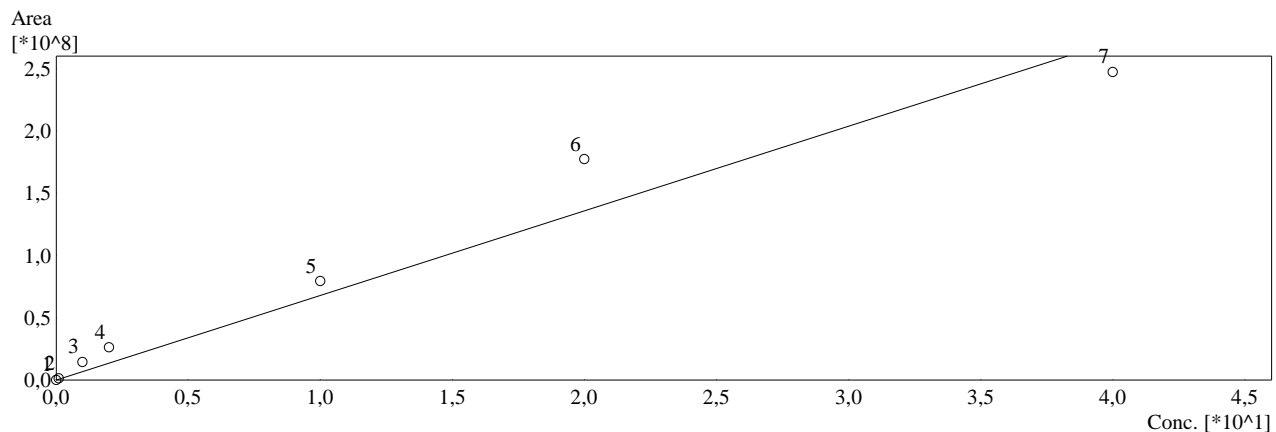

Calibration Curve 10

m/z : 361,30>170,10  
Name : Lysine  
Quantitative Method : External Standard  
Function :  $f(x)=3,78353e+006*x+0$   
R2=0,9919378

FitType : Linear

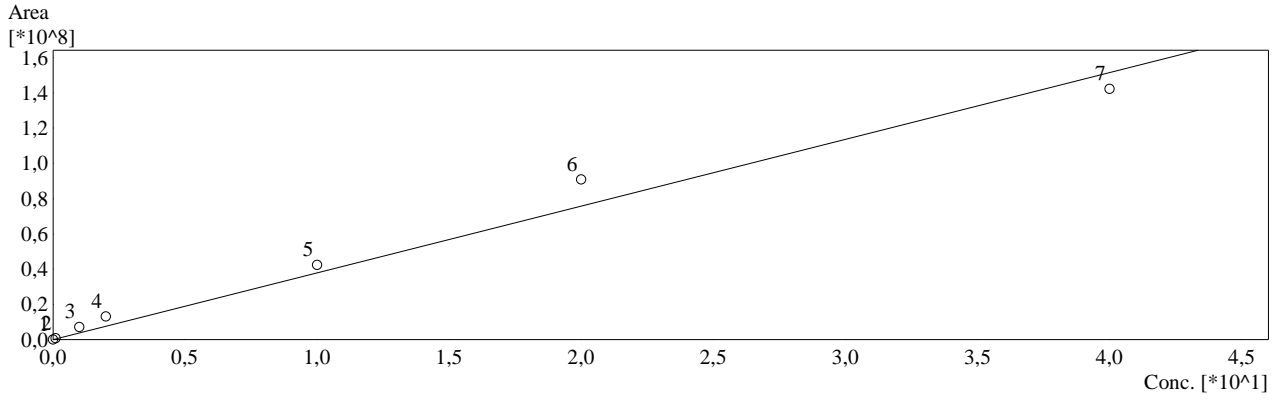

Calibration Curve 11

m/z : 304,00>216,15  
Name : Aspartic acid  
Quantitative Method : External Standard  
Function :  $f(x)=4,17071e+006*x+0$   
R2=0,9862119

FitType : Linear

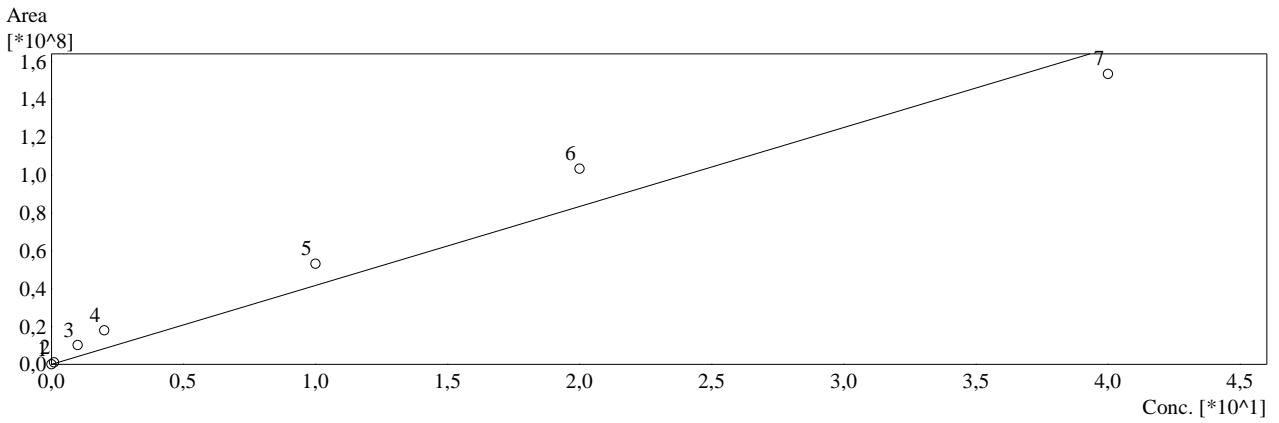

Calibration Curve 12

m/z : 369,90>110,15  
Name : Histidine  
Quantitative Method : External Standard  
Function :  $f(x)=2,11605e+006*x+0$   
R2=0,9921466

FitType : Linear

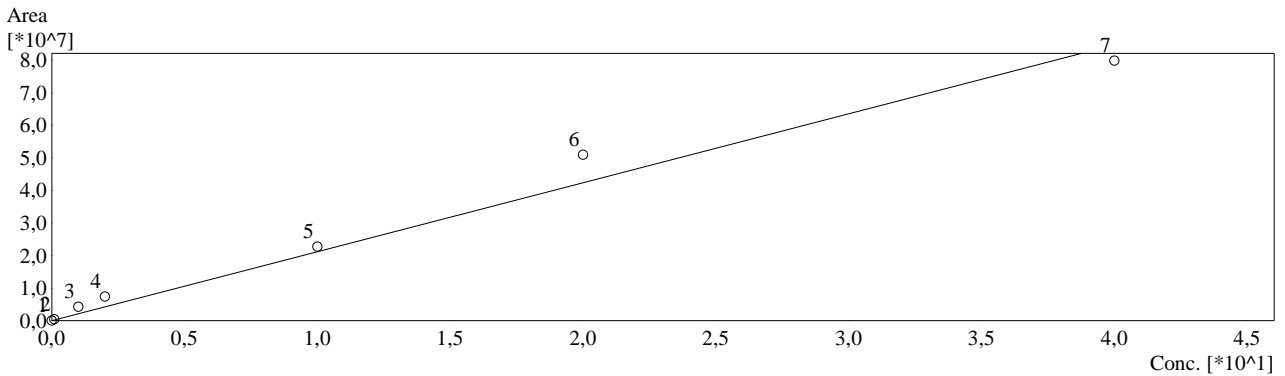

Calibration Curve 13

m/z : 246,20>158,15  
Name : Valine  
Quantitative Method : External Standard  
Function :  $f(x)=5,35831e+006*x+0$   
R2=0,9925219

FitType : Linear

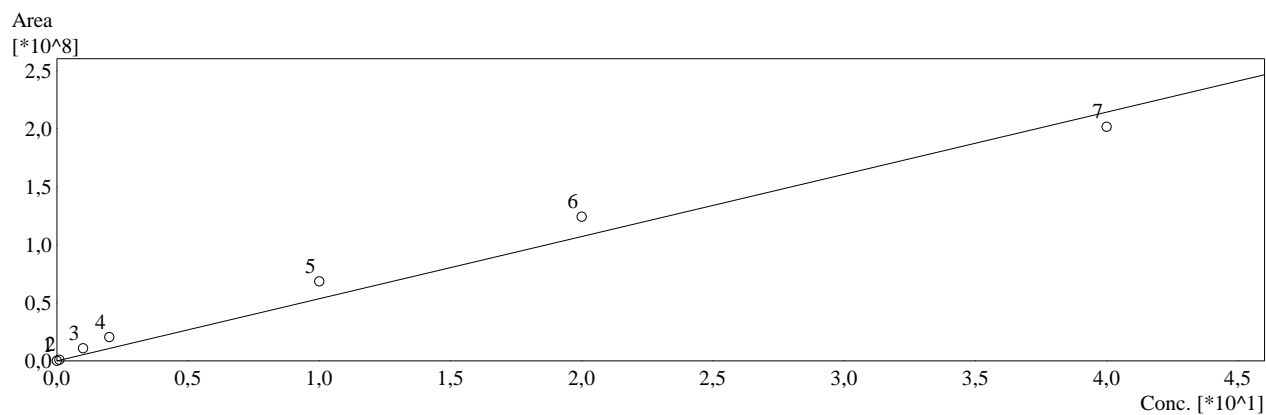

Calibration Curve 14

m/z : 318,20>230,05  
Name : Glutamic acid  
Quantitative Method : External Standard  
Function :  $f(x)=2,52135e+006*x+0$   
R2=0,9980916

FitType : Linear

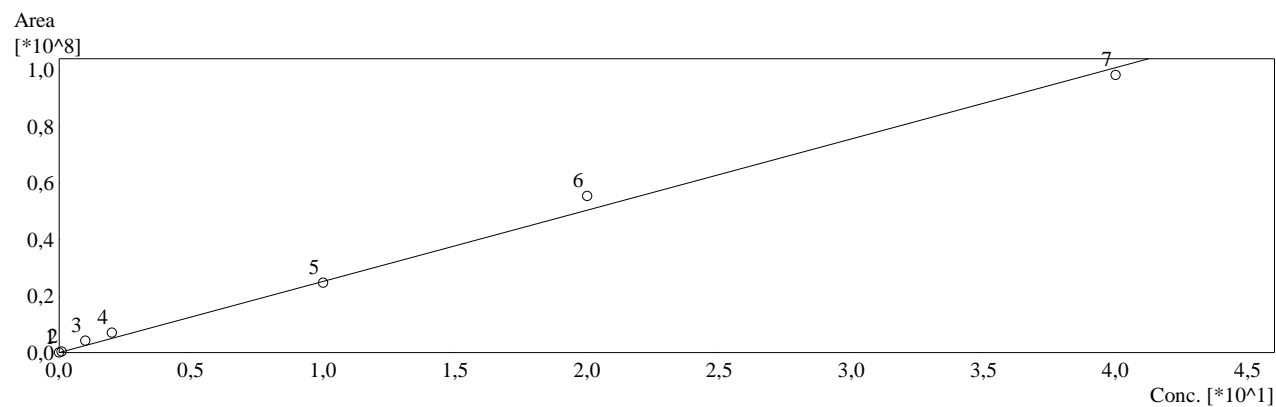

Calibration Curve 15

m/z : 333,20>245,15  
Name : Tryptophan  
Quantitative Method : External Standard  
Function :  $f(x)=4,77018e+006*x+0$   
R2=0,9952573

FitType : Linear

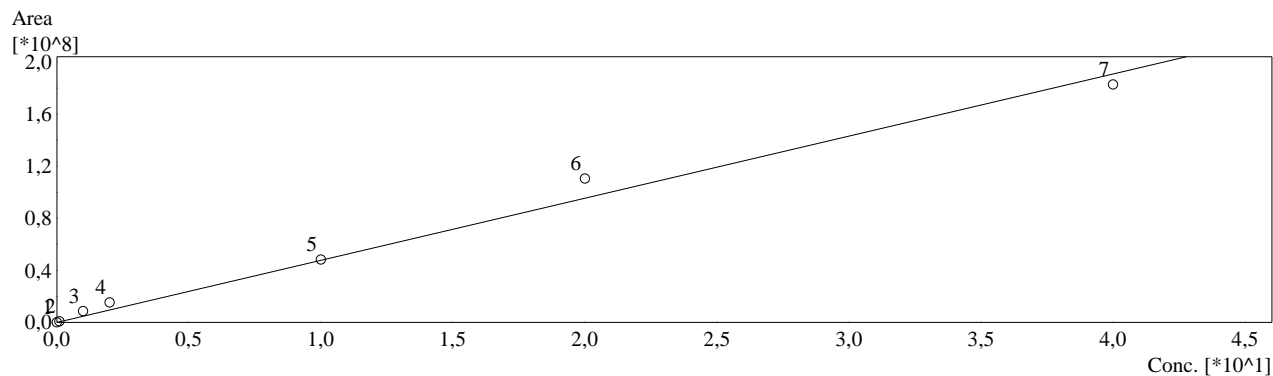

Calibration Curve 16

m/z : 260,20>172,15  
Name : Leucine  
Quantitative Method : External Standard  
Function :  $f(x)=6,97147e+006*x+0$   
R2=0,9752002

FitType : Linear

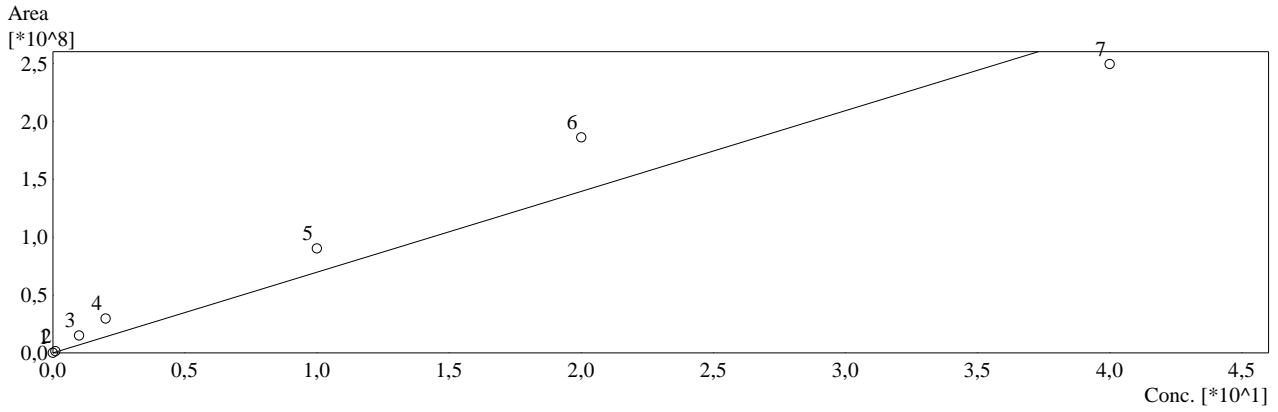

Calibration Curve 17

m/z : 294,20>206,20  
Name : Phenylalanine  
Quantitative Method : External Standard  
Function :  $f(x)=7,01532e+006*x+0$   
R2=0,9927326

FitType : Linear

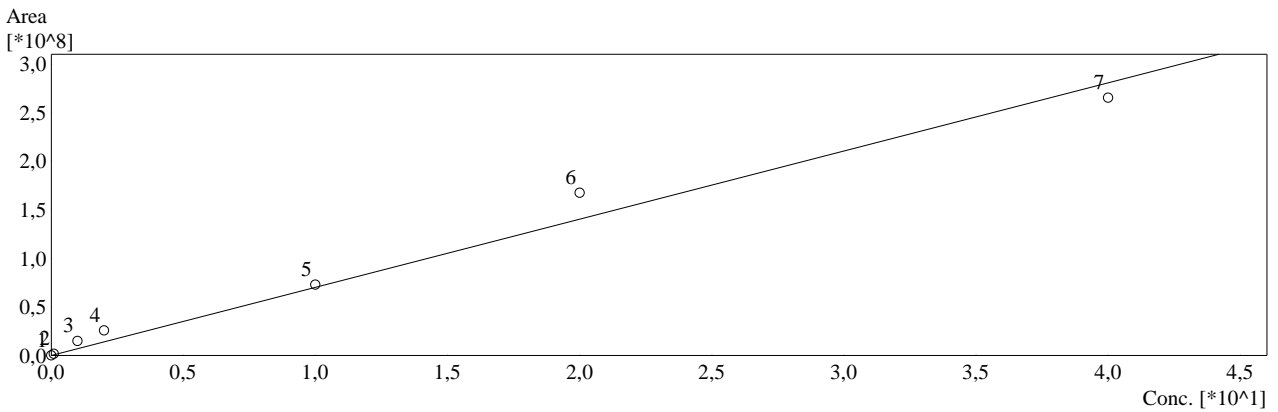

Calibration Curve 18

m/z : 260,20>130,10  
Name : Isoleucine  
Quantitative Method : External Standard  
Function :  $f(x)=4,50428e+006*x+0$   
R2=0,9962767

FitType : Linear

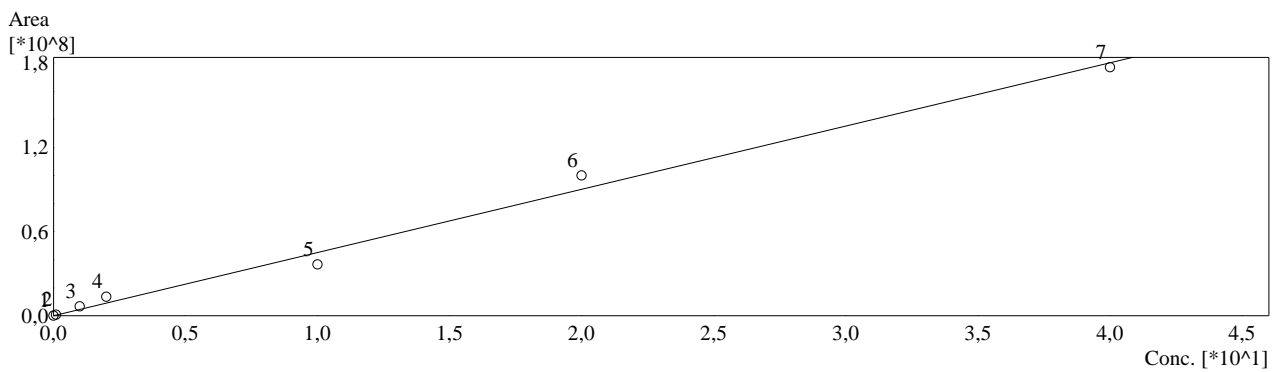

Calibration Curve 19

m/z : 396,20>136,05  
Name : Tyrosine  
Quantitative Method : External Standard  
Function :  $f(x)=1,02065e+006*x+0$   
R2=0,9955572

FitType : Linear

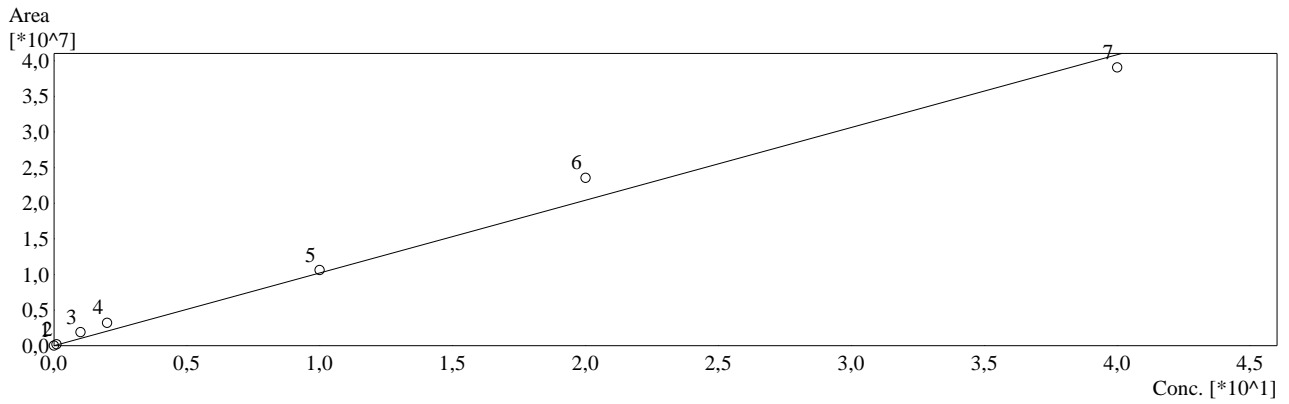

Calibration Curve 20

m/z : 317,30>84,15  
Name : Homoarginine  
Quantitative Method : External Standard  
Function :  $f(x)=1,65372e+006*x+0$   
R2=0,9994871

FitType : Linear

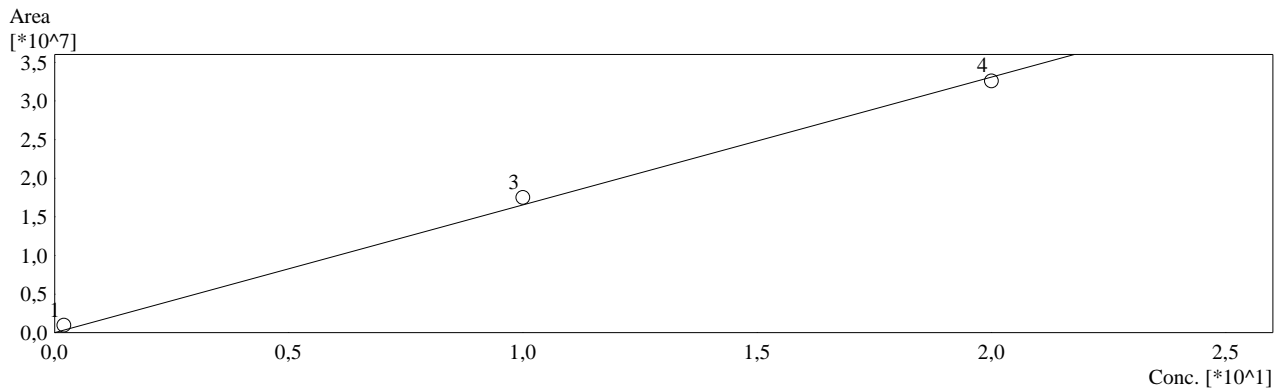

Calibration Curve 21

m/z : 281,20>193,00  
Name : Methionine-d3  
Quantitative Method : External Standard  
Function :  $f(x)=8,79136e+006*x+0$   
R2=0,9976819

FitType : Linear

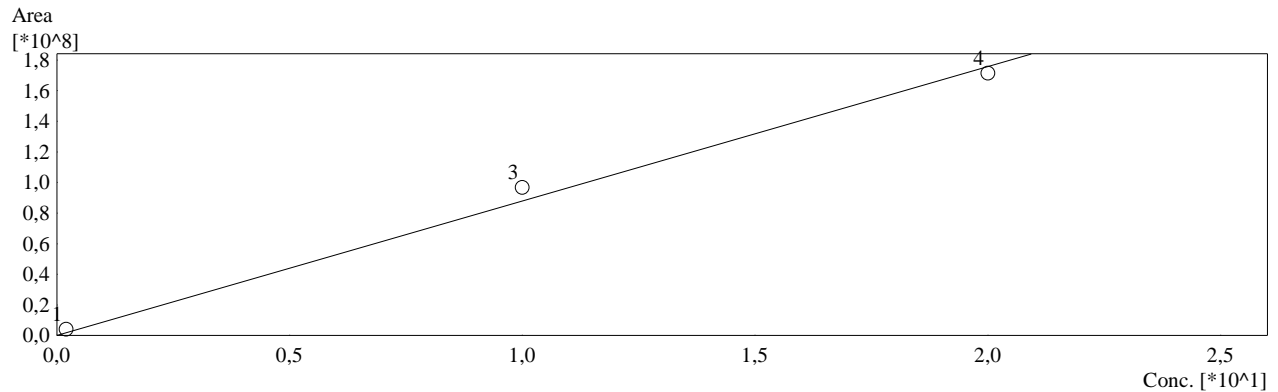

Calibration Curve 21

m/z : 281.20>193.00  
Name : Methionine-d3  
Quantitative Method : External Standard  
Function :  $f(x)=8,79136e+006*x+0$   
R2=0,9976819

FitType : Linear

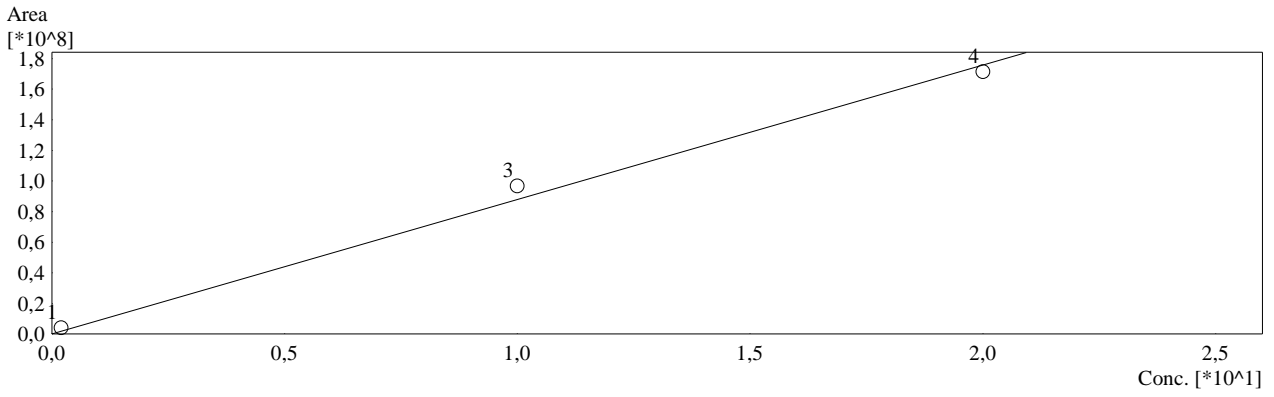



Calibration Curve 22

m/z : 308,20>104,20  
Name : Homophenylalanine  
Quantitative Method : External Standard  
Function :  $f(x)=9,11139e+006*x+0$   
R2=0,9998443

FitType : Linear

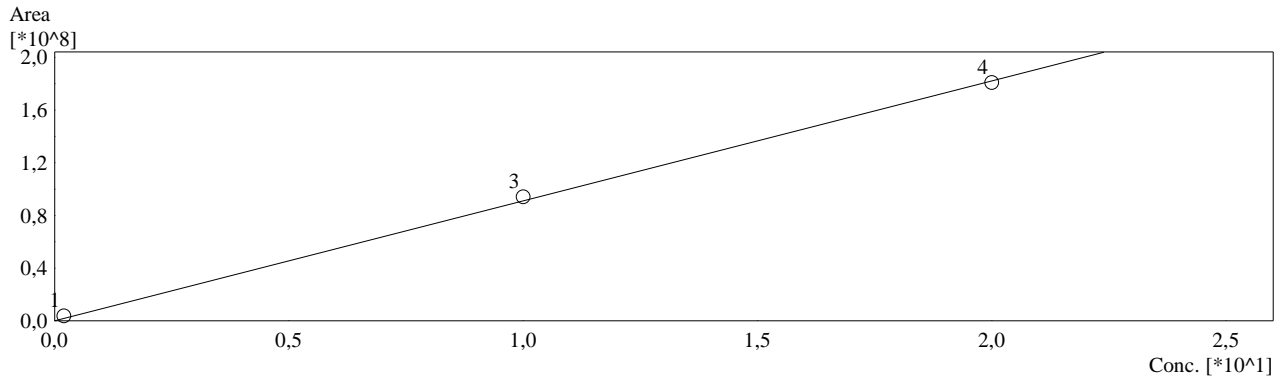

Supplement: c5ay01280e1.pdf [file c5ay01280e1.pdf]
